# Supplementary material for: The origin of unwanted editing byproducts in gene editing: Origin of unwanted editing byproducts in gene editing
Source: PubMed Central journal article supplement (PMC9827802; doi:10.3724/abbs.2022056), 2022-05-25
Supplement: tables.pdf [file tables.pdf]

**Table 1. Application of Cas9 nuclease in clinical therapy\***

| Target genes             | Clinical ID                                                   | Therapy                             | Disease                                                                               | Stage     |
|--------------------------|---------------------------------------------------------------|-------------------------------------|---------------------------------------------------------------------------------------|-----------|
| <i>TRAC, B2M</i>         | NCT03166878,<br>NCT03229876,<br>NCT03166878                   | CAR-T                               | B cell leukemia                                                                       | Phase 1/2 |
| <i>TRAC, TRBC, B2M</i>   | NCT04244656,<br>NCT03166878                                   | T cell therapy, CAR-T               | Myeloma, B cell lymphoma                                                              | -         |
| <i>TRAC, TRBC, PDCD1</i> | NCT03399448,<br>NCT03545815                                   | TCR-T                               | B cell leukemia and solid tumor                                                       | Phase 1   |
| <i>TRAC</i>              | NCT03398967                                                   | CD19, CD20 or CD22<br>CAR-T therapy | Relapsed or refractory<br>hematological malignancies                                  | Phase 1/2 |
|                          | NCT02793856                                                   | T cell therapy                      | Advanced Non-small Cell Lung<br>Cancer                                                | Phase 1   |
|                          | NCT02863913                                                   | T cell therapy                      | Stage IV bladder cancer                                                               | Phase 1   |
| <i>PDCD1</i>             | NCT02867332                                                   | T cell therapy                      | Metastatic renal cell carcinoma                                                       | Phase 1   |
|                          | NCT03081715                                                   | T cell therapy                      | Esophageal cancer                                                                     | Phase 1   |
|                          | NCT02867345                                                   | T cell therapy                      | Hormone refractory prostate<br>cancer                                                 | Phase 1   |
| <i>CD7</i>               | NCT03690011                                                   | CAR-T                               | T cell leukemia                                                                       | Phase 1   |
| <i>CD70</i>              | NCT04438083                                                   | T cell therapy                      | Hematologic malignancies and<br>renal cell carcinoma                                  | Phase 1   |
| <i>CCR5</i>              | NCT03164135                                                   | HSPC therapy                        | HIV and leukemia                                                                      | -         |
| <i>BCL11A</i>            | NCT03432364,<br>NCT03655678,<br>NCT03745287,<br>CRISPR_SCD001 | HSC therapy                         | Transfusion-dependent $\beta$ -<br>thalassemia (TDT) and sickle<br>cell disease (SCD) | Phase 1/2 |
| <i>HBB</i>               | NCT03728322                                                   | HSC therapy                         | TDT                                                                                   | Phase 1   |
| <i>CEP290</i>            | NCT03872479                                                   | AAV therapy                         | Leber congenital amaurosis<br>type 10 (LCA10)                                         | Phase 2   |
| <i>CISH</i>              | NCT03538613,<br>NCT04089891                                   | T cell therapy                      | Metastatic gastrointestinal<br>epithelial cancer                                      | Phase 1/2 |

\*Because of space limitation, only typical methods are cited here.

**Table 2. Methods for the detection of byproducts generated by Cas9 \***

| Method           | <i>In vivo</i> /<br><i>in vitro</i> /<br><i>In silico</i> | Assay type                                                     | Comment                                                         |                                                                       |
|------------------|-----------------------------------------------------------|----------------------------------------------------------------|-----------------------------------------------------------------|-----------------------------------------------------------------------|
| Cas-<br>OFFinder | <i>In silico</i>                                          | Off-target                                                     | Sequence alignment                                              | High false positive                                                   |
| CAST-seq         | <i>In vivo</i>                                            | Chromosomal<br>structural variations,<br>indels                | Map translocations with<br>induced DSBs                         | High-sensitivity;<br>not applicable to limited<br>material            |
| CIRCLE-seq       | <i>In vitro</i>                                           | Off-target                                                     | Sequence cleaved linear DNA<br>from circularized genomic<br>DNA | High-sensitivity;<br>Requires <i>in vivo</i><br>cleavage confirmation |
| Dig-seq          | <i>In vitro</i>                                           | Off-target                                                     | Whole-genome sequencing for<br>cleaved chromatin                | High-sensitivity;                                                     |
| Digenome-<br>seq | <i>In vitro</i>                                           | Off-target                                                     | Whole-genome sequencing for<br>cleaved naked genomic DNA        | High-sensitivity;<br>Requires <i>in vivo</i><br>cleavage confirmation |
| DISCOVER-<br>seq | <i>In vivo</i>                                            | Off-target                                                     | Pull down Mre11 binding to<br>broken ends                       | Narrow time-window<br>(only maps unjoined<br>ends); low resolution    |
| GUIDE-seq        | <i>In vivo</i>                                            | Off-target                                                     | Integrate dsODNs into DSB<br>sites                              | Unbiased; limited use<br>for blunt-ended DSBs                         |
| LAM-<br>HTGTS    | <i>In vivo</i>                                            | Off-target,<br>chromosomal<br>structural variations            | Map translocations with<br>induced DSBs or recurrent<br>DSBs    | High-sensitivity;<br>not applicable to limited<br>material            |
| PEM-seq          | <i>In vivo</i>                                            | Off-target,<br>chromosomal<br>structural variations,<br>indels | Map translocations with<br>induced DSBs or recurrent<br>DSBs    | High-sensitivity;<br>not applicable to limited<br>material            |
| SITE-seq         | <i>In vitro</i>                                           | Off-target                                                     | Map broken ends with<br>biotinylated adapters                   | High-sensitivity;<br>Requires <i>in vivo</i><br>cleavage confirmation |
| UDiTaS           | <i>In vivo</i>                                            | Chromosomal<br>structural variations,<br>indels                | Map translocations with<br>induced DSBs                         | Low sensitivity due to<br>no nested PCR                               |

\*Because of space limitation, only typical methods are cited here.
